# Supplementary material for: Metabolomics-Based Profiling, Antioxidant Power, and Uropathogenic Bacterial Anti-Adhesion Activity of SP4TM, a Formulation with a High Content of Type-A Proanthocyanidins
Source: MDPI journal article supplement (doi:10.3390/antiox11071234), 2022-06-23
Supplement: s1 [file s1]

Supplementary Material

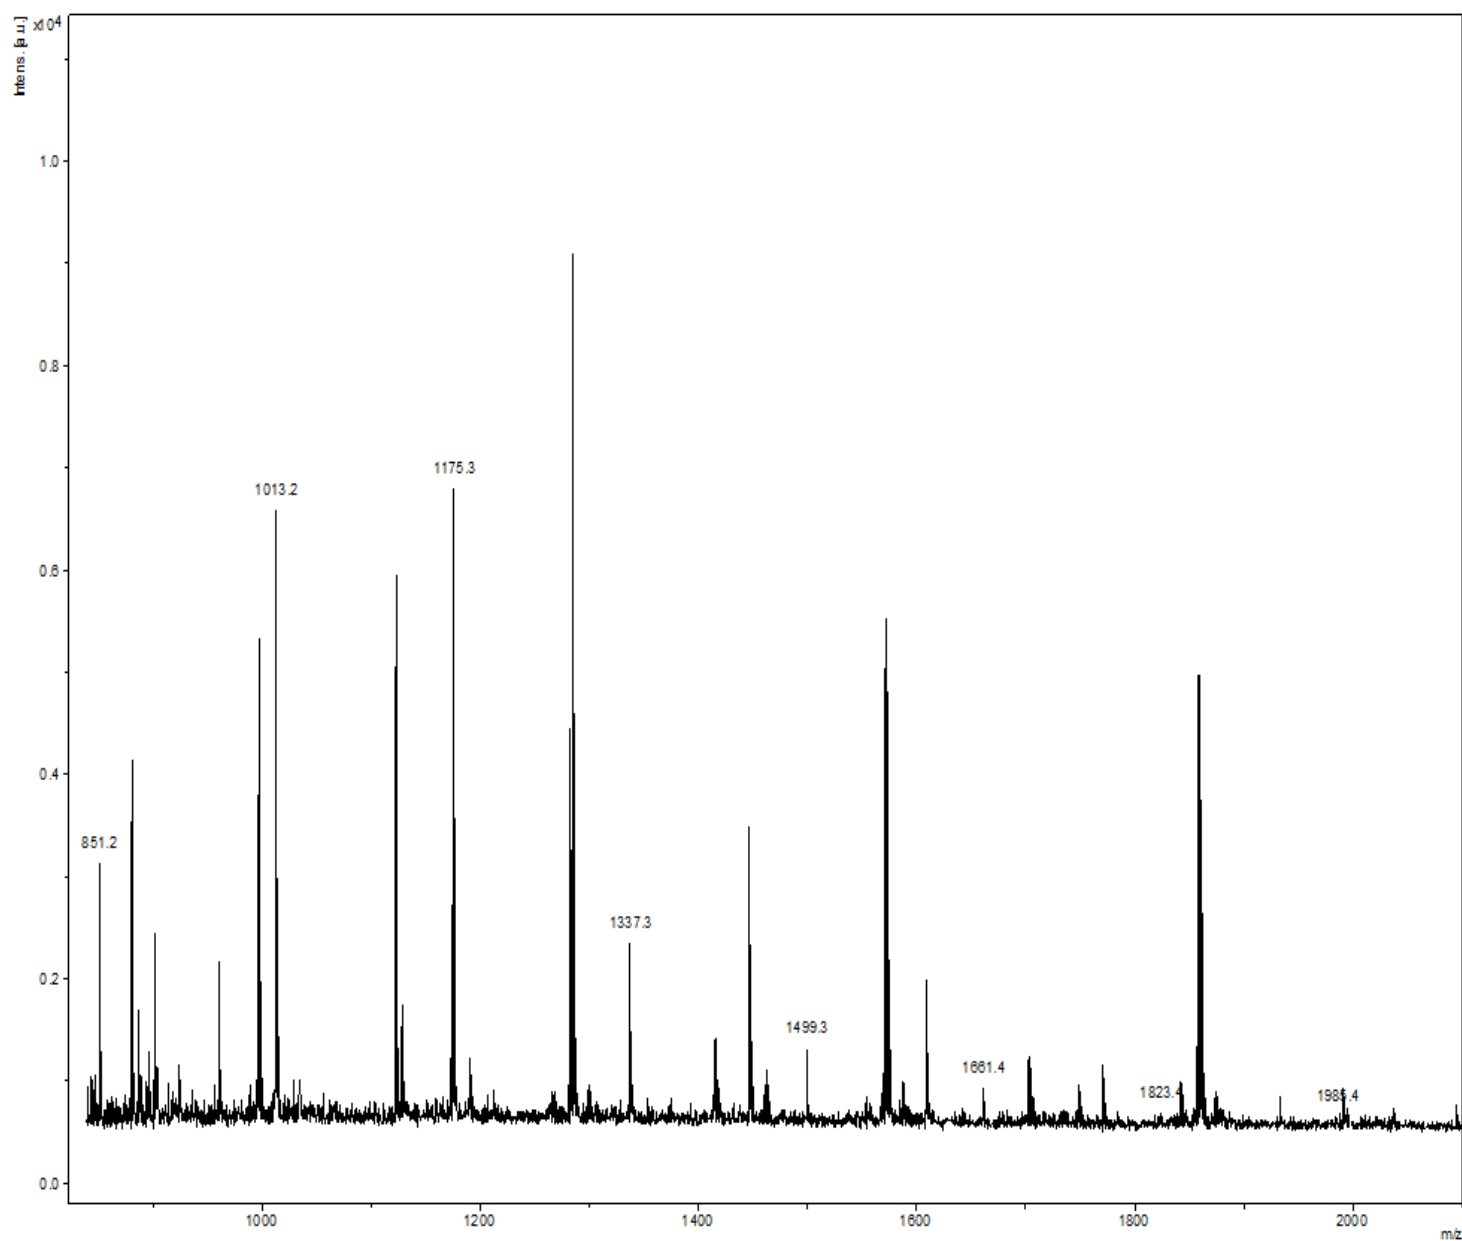

**Figure S1.** Positive reflectron mode MALDI-TOF MS oligosaccharide series of repeating hexoses from 5 degrees of polymerization ( $m/z$  851) to 12 degrees of polymerization ( $m/z$  1985). Masses are detected as sodium ion adducts  $[M+Na]^+$ .
